# Supplementary material
Source: PubMed Central journal article supplement (PMC2965191)
Supplement: Supp_Data.pdf [file Supp_Data.pdf]

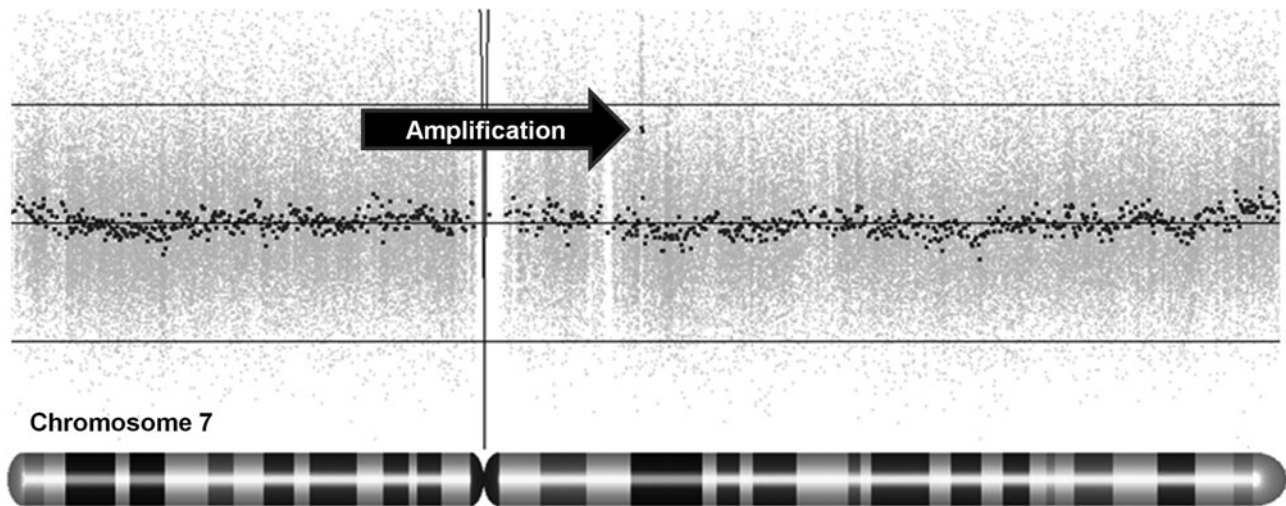

**SUPPLEMENTAL FIG. S1.** Scheme of comparative genomic hybridization region of amplification. MSCs from donors 281Lp2 and 260Rp2 were plated at 100 cells/cm<sup>2</sup> and replated at day 7 through 15 passages with medium changed on days 3 and 6. Samples from both donors showed no significant amplifications, deletions, or loss of heterozygosity at passage 8. Donor 281L showed a significant amplification of 400 kb on chromosome 7, but no deletions or loss of heterozygosity. MSCs, mesenchymal stem cells.

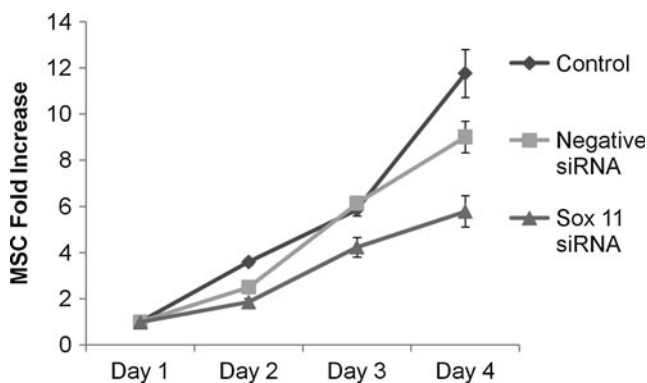

**SUPPLEMENTAL FIG. S2.** *Sox11* knockdown decreases proliferation of MSCs at higher density. *Sox11* expression relative quantity was measured by real-time reverse transcriptase-polymerase chain reaction in MSCs transfected with siRNA for *Sox11* or negative control, scrambled sequences. MSCs from donor 7027Lp2 were plated at 100 cells/cm<sup>2</sup> and transfected 4 days later when the cells were ~50% confluent. MSC proliferation was negatively affected after 2–3 days of culture (mean  $\pm$  95% confidence interval for triplicate assays).

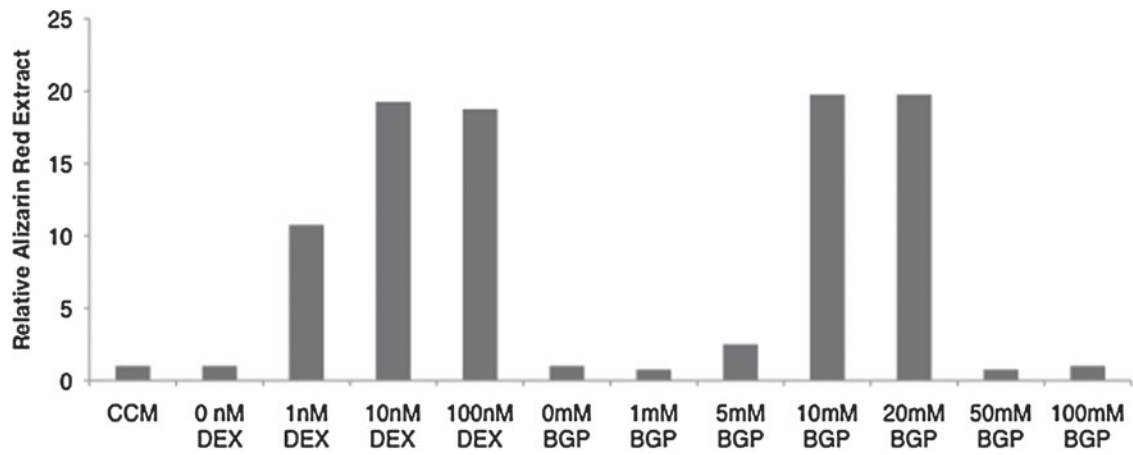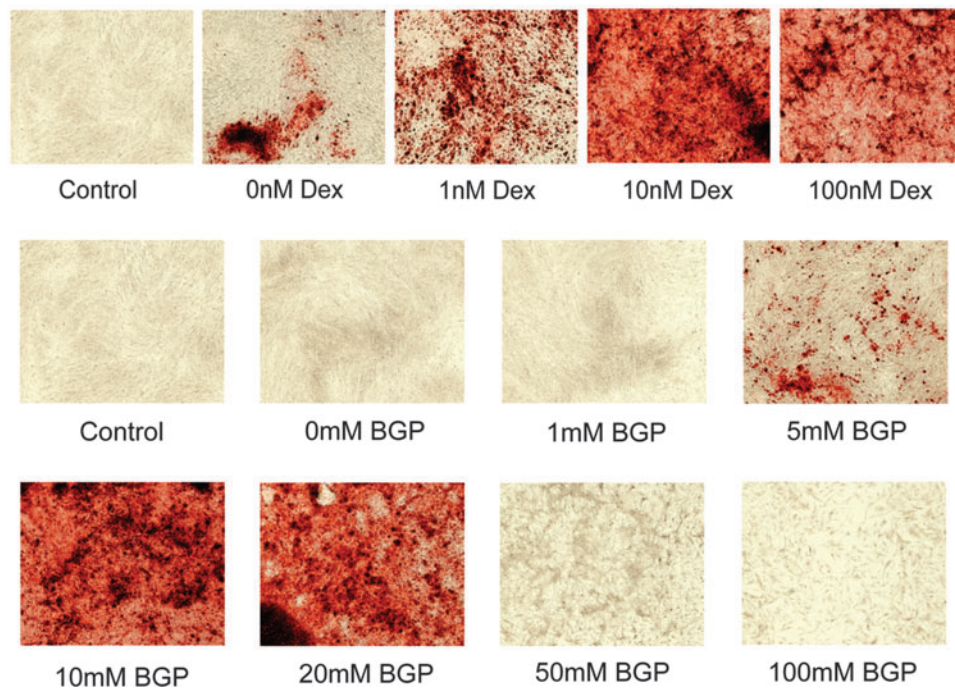

**SUPPLEMENTAL FIG. S3.** BGP and DEX dosage optimization during osteogenesis. MSCs from donor 7068Lp2 were plated at 100 cells/cm<sup>2</sup> and cultured until 70% confluence at day 7 when the complete culture medium (control) or osteogenic medium was added with varying concentrations of BGP with DEX at 10 nM and varying concentrations of DEX with BGP at 10 mM. Relative Alizarin Red was measured when mineralized monolayers began to detach at 11 days after differentiation. BGP, beta-glycerol phosphate; DEX, dexamethasone.

SUPPLEMENTAL TABLE S1. DATA FROM REAL-TIME  
 REVERSE TRANSCRIPTASE-POLYMERASE CHAIN REACTION  
 ASSAYS FOR EXPRESSION OF 19 GENES FOR PATHWAYS  
 KNOWN TO BE INVOLVED IN SIGNALING OF DNA DAMAGE

| <i>Gene</i>   | <i>P6 versus<br/>P2-fold change</i> | <i>P12 versus<br/>P2-fold change</i> |
|---------------|-------------------------------------|--------------------------------------|
| <i>ABL1</i>   | NS                                  | -1.49                                |
| <i>ATM</i>    | NS                                  | -1.29                                |
| <i>ATR</i>    | NS                                  | -1.32                                |
| <i>CHEK2</i>  | NS                                  | -1.32                                |
| <i>CIDEA</i>  | 1.61                                | NS                                   |
| <i>DDB1</i>   | 1.21                                | NS                                   |
| <i>FEN1</i>   | 1.62                                | NS                                   |
| <i>LIG1</i>   | NS                                  | -1.73                                |
| <i>MBD4</i>   | NS                                  | -1.61                                |
| <i>N4BP2</i>  | NS                                  | -2.46                                |
| <i>NBN</i>    | NS                                  | -1.52                                |
| <i>OGG1</i>   | NS                                  | 1.09                                 |
| <i>RAD50</i>  | 1.26                                | NS                                   |
| <i>RPA1</i>   | 1.34                                | NS                                   |
| <i>SEMA4A</i> | NS                                  | -2.15                                |
| <i>SMC1A</i>  | 1.37                                | NS                                   |
| <i>SUMO1</i>  | NS                                  | -1.24                                |
| <i>XPA</i>    | NS                                  | -1.62                                |
| <i>XRCC2</i>  | NS                                  | 1.69                                 |

Significant changes in expression of DNA damage signaling pathway genes (*t*-test,  $p < 0.05$ ). NS denotes fold changes that were not significant.

SUPPLEMENTAL TABLE S2. MICROARRAY DATA FOR TRANSCRIPTS WITH LARGEST CHANGES IN SIGNAL INTENSITIES BETWEEN DAY 2 AND 7 WITH EXPANSION OF THE CELLS

| <i>Gene</i>                          | <i>Day 2 versus 7</i> |           |            |            |
|--------------------------------------|-----------------------|-----------|------------|------------|
|                                      | <i>P2</i>             | <i>P5</i> | <i>P10</i> | <i>P15</i> |
| Endothelial cell-specific molecule 1 | 26.8                  | 12.6      | 45.5       | 16.1       |
| Podocalyxin-like                     | 21.1                  | 5.6       | 10.5       | 4.2        |
| Chorionic gonadotropin               | 18.9                  | 8.9       | 5.4        | 8.0        |
| Retinoic acid receptor, beta         | 15.4                  | 2.0       | -1.1       | -1.2       |
| Claudin 4                            | 14.6                  | 5.6       | 8.3        | -1.6       |
| Placental growth factor              | 8.6                   | 5.3       | 17.6       | 12.5       |
| Laminin, gamma 2                     | 7.5                   | 13.7      | 15.0       | 14.6       |
| SMAD, mothers against DPP homolog 1  | 7.0                   | -1.2      | -1.3       | -1.2       |
| Integrin, alpha 6                    | 6.6                   | 3.0       | 4.4        | 3.1        |
| Annexin A8                           | 6.5                   | 10.8      | 1.3        | 5.0        |
| Syndecan 1                           | 6.0                   | 3.0       | 4.5        | 4.4        |
| Matrix metalloproteinase 1           | 5.9                   | -1.2      | 1.6        | 3.5        |

  

| <i>Gene</i>                                        | <i>Day 2 versus 7</i> |           |            |            |
|----------------------------------------------------|-----------------------|-----------|------------|------------|
|                                                    | <i>P2</i>             | <i>P5</i> | <i>P10</i> | <i>P15</i> |
| Synaptopodin 2                                     | -118.7                | -11.5     | -8.8       | -7.1       |
| 5-Hydroxytryptamine (serotonin) receptor 1E        | -31.2                 | -1.6      | -1.5       | 1.3        |
| Aggrecan 1                                         | -29.5                 | -3.4      | -3.7       | -2.6       |
| Integrin, alpha 7                                  | -25.3                 | -7.9      | -5.8       | -8.2       |
| Cytochrome P450                                    | -22.6                 | -26.1     | -44.3      | -45.6      |
| Gelsolin                                           | -20.7                 | -8.0      | -5.5       | -5.2       |
| Thrombospondin 2                                   | -19.6                 | -3.1      | -3.4       | -1.0       |
| Glypican 6                                         | -18.6                 | -1.7      | 1.6        | 1.3        |
| Fibroblast growth factor 7                         | -16.2                 | -5.0      | -2.1       | 1.1        |
| Signal transducer and activator of transcription 4 | -15.6                 | -9.8      | -6.0       | -8.6       |
| Collagen, type XI, alpha 1                         | -15.1                 | -1.5      | 1.2        | -1.8       |
| Hyaluronan synthase 3                              | -14.9                 | -3.5      | -5.1       | -3.9       |
| Collagen, type XII, alpha 1                        | -14.9                 | -2.6      | -2.7       | -2.1       |
| Synaptopodin 2                                     | -14.5                 | -3.8      | -6.0       | -3.4       |
| Collagen, type VI, alpha 1                         | -14.3                 | -1.9      | -1.9       | -1.4       |
| Decorin                                            | -12.3                 | -3.3      | -1.1       | -2.6       |
| Vascular cell adhesion molecule 1                  | -11.5                 | -2.8      | -1.4       | -1.6       |
| Early growth response 1                            | -10.2                 | -1.9      | -2.0       | -2.8       |
